# Supplementary material for: Genetic polymorphism of the OPG gene associated with breast cancer
Source: PubMed Central journal article supplement (PMC3563620; doi:10.1186/1471-2407-13-40), 2013-01-31

$\chi^2$  tests – Goodness-of-fit tests: Contingency tables  
Df = 1, Effect size  $w = 0.074$ ,  $\alpha$  err prob = 0.05

a

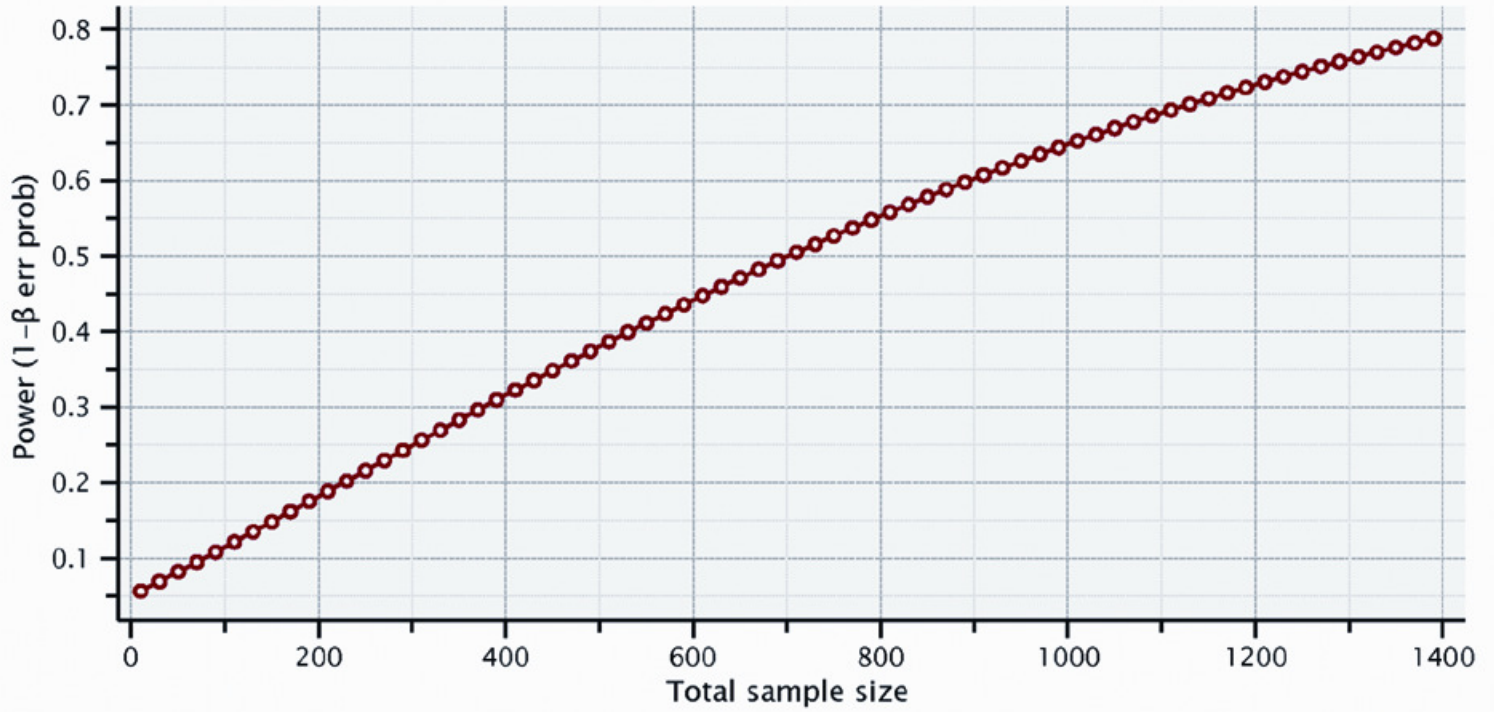

$\chi^2$  tests – Goodness-of-fit tests: Contingency tables  
Df = 2, Effect size  $w = 0.107$ ,  $\alpha$  err prob = 0.05

b

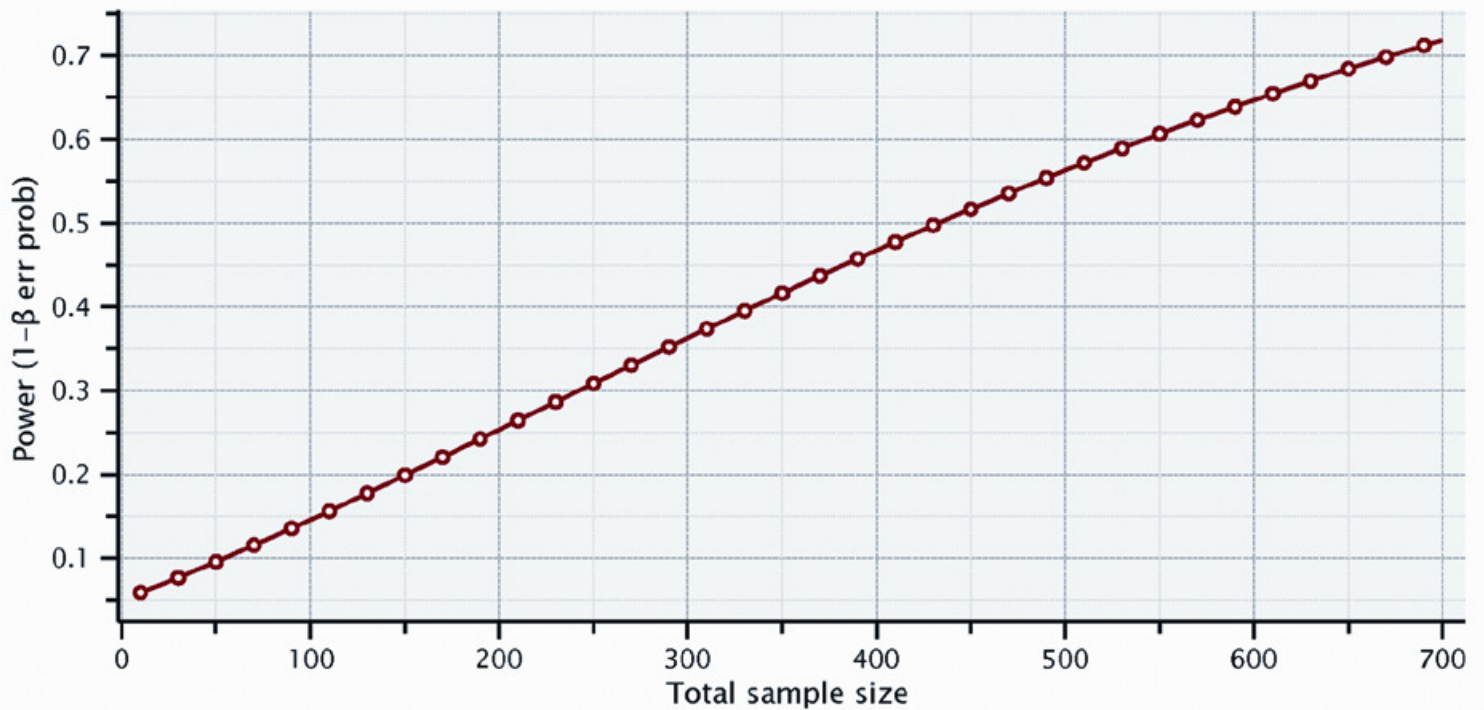

Supplement: 1471-2407-13-40-S1.pdf [file 1471-2407-13-40-S1.pdf]
